# Supplementary material for: Organizational- and system-level characteristics that influence implementation of shared decision-making and strategies to address them — a scoping review
Source: Springer Nature journal article supplement (doi:10.1186/s13012-018-0731-z), 2018-03-09
Supplement: MOESM2 [file 15523294]

## PubMed, WoS and CINAHL searches run on Oct 10, 2016

|                | Search results | Imported into EndNote | Imported into EndNote duplicates library (automatically) | Duplicates found manually (IS) |
|----------------|----------------|-----------------------|----------------------------------------------------------|--------------------------------|
| PubMed         | 5216           | 5216                  | 0                                                        | 16                             |
| Web of Science | 5047           | 2806                  | 2241                                                     | 773                            |
| CINAHL         | 506            | 431                   | 75                                                       | 40                             |
| Totals         | 10,679         | 8363                  | 2316                                                     | 829                            |

### PubMed

((("Decision Making"[Mesh] AND ("patient participation" [mesh] OR "patient-centered care" [mesh] OR "patient preference"[mesh])) OR ("Decision support techniques" [mesh] AND ("patient participation" [mesh] OR "patient-centered care" [mesh] OR "patient preference"[mesh])) OR Shared decision making [tiab] OR Decision support [tiab] OR Patient engagement [tiab] OR Decision aid\* [tiab] OR Patient involvement [tiab] OR Informed decision\* [tiab]) AND ("Program Evaluation"[Mesh] OR "Organizational Culture"[mesh] OR "Quality Improvement"[Mesh] OR Program evaluation [tiab] OR Organizational culture [tiab] OR Organisational culture [tiab] OR Quality improvement [tiab] OR Implement\* [tiab] OR Routine care [tiab] OR Routine practice [tiab] OR Routine clinical practice [tiab] OR Knowledge translation [tiab])

Filters activated: Publication date from 1997/01/01, English, German.

Search run Oct 10, 2016 = 5216 results

### CINAHL

((((MH "Decision Making+" AND (MH "Consumer Participation" OR MH "Patient Centered Care" OR (MH "Patient Education"))) OR (MH "Decision Support Techniques+" AND (MH "Consumer Participation" OR MH "Patient Centered Care" OR (MH "Patient Education"))) OR "Shared decision making" OR "Decision support" OR "Patient engagement" OR "Decision aid\*" OR "Patient involvement" OR "Informed decision\*"))

AND

((MH "Program Evaluation" OR MH "Organizational Culture" OR MH "Quality Improvement+" OR "Program evaluation" OR "Organizational culture" OR "Organisational culture" OR "Quality improvement" OR Implement\* OR "Routine care" OR "Routine practice" OR "Routine clinical practice" OR "Knowledge translation"))

Date limit: 1997-present

Exclude MEDLINE records

Limit to English or German: 506 hits (search run Oct 10, 2016)

### Web of Science

("Shared decision making" OR "Decision support" OR "Patient engagement" OR "Decision aid\*" OR "Patient involvement" OR "Informed decision\*") AND ("Program evaluation" OR "Organizational culture" OR "Organisational culture" OR "Quality improvement" OR Implement\* OR "Routine care" OR "Routine practice" OR "Routine clinical practice" OR "Knowledge translation") AND (Medicine OR Medical OR Hospital\* OR Nurs\* OR Health OR patient\* OR clinical)

Date limit: 1997-present  
Language: German or English  
Oct 10, 2016 search: 5047 results
